# Supplementary material for: Basis of single-seed formation in chestnut: cytomorphological observations reveal ovule developmental patterns of Castanea henryi
Source: PeerJ. 2025 Jan 2;13:e18711. doi: 10.7717/peerj.18711 (PMC11700494; doi:10.7717/peerj.18711)
Supplement: Supplemental Information 8 [file peerj-13-18711-s008.xlsx]

## Sheet: 4-5 weeks after pollination
Statistical raw data on the normal development rate of ovules in single ovary at 4-5 weeks after pollination of two treatments in Castanea henryi
NO.	Pollinated				NO.	Unpollinated
	Number of ovules per a ovary	Normal number of developing ovules	Proportion of normal development ovule	Proportion of normal development ovule (keep integers)		Number of ovules per a ovary	Normal number of developing ovules	Proportion of normal development ovule	Proportion of normal development ovule (keep integers)
1	24	16	66.6667	66.6667	1	18	8	44.4444	44.4444
2	18	12	66.6667	66.6667	2	24	9	37.5	37.5
3	20	13	65	65	3	22	9	40.9091	40.9091
4	22	15	68.1818	68.1818	4	16	7	43.75	43.75
5	22	15	68.1818	68.1818	5	20	8	40	40
6	24	16	66.6667	66.6667	6	16	7	43.75	43.75
7	22	15	68.1818	68.1818	7	20	8	40	40
8	18	12	66.6667	66.6667	8	22	9	40.9091	40.9091
9	20	14	70	70	9	24	11	45.8333	45.8333
10	24	16	66.6667	66.6667	10	20	8	40	40
11	20	14	70	70	11	18	8	44.4444	44.4444
12	18	12	66.6667	66.6667	12	20	9	45	45
13	16	11	68.75	68.75	13	22	9	40.9091	40.9091
14	18	12	66.6667	66.6667	14	24	10	41.6667	41.6667
15	22	15	68.1818	68.1818	15	20	9	45	45
16	18	12	66.6667	66.6667	16	18	8	44.4444	44.4444
17	22	15	68.1818	68.1818	17	22	9	40.9091	40.9091
18	24	16	66.6667	66.6667	18	18	8	44.4444	44.4444
19	20	14	70	70	19	22	9	40.9091	40.9091
20	16	11	68.75	68.75	20	20	8	40	40
Average value			67.6705	67.6705	Average value			42.2412	42.2412
Standard deviation			1.37875	1.37875	Standard deviation			2.33812	2.33812

## Sheet: 6 weeks after pollination
Statistical raw data on the normal development rate of ovules in single ovary at 6 weeks after pollination of two treatments in Castanea henryi
NO.	Pollinated				NO.	Unpollinated
	Number of ovules per a ovary	Normal number of developing ovules	Proportion of normal development ovule	Proportion of normal development ovule (keep integers)		Number of ovules per a ovary	Normal number of developing ovules	Proportion of normal development ovule	Proportion of normal development ovule (keep integers)
1	18	10	55.5556	55.5556	1	22	4	18.1818	18.1818
2	18	9	50	50	2	24	4	16.6667	16.6667
3	20	11	55	55	3	22	4	18.1818	18.1818
4	18	10	55.5556	55.5556	4	20	3	15	15
5	20	11	55	55	5	24	4	16.6667	16.6667
6	22	11	50	50	6	20	3	15	15
7	22	12	54.5455	54.5455	7	20	3	15	15
8	22	12	54.5455	54.5455	8	18	3	16.6667	16.6667
9	20	11	55	55	9	24	4	16.6667	16.6667
10	18	10	55.5556	55.5556	10	20	3	15	15
11	18	9	50	50	11	20	4	20	20
12	22	12	54.5455	54.5455	12	18	3	16.6667	16.6667
13	20	11	55	55	13	24	4	16.6667	16.6667
14	20	10	50	50	14	22	4	18.1818	18.1818
15	20	11	55	55	15	20	3	15	15
16	22	11	50	50	16	20	3	15	15
17	18	10	55.5556	55.5556	17	20	3	15	15
18	20	10	50	50	18	22	4	18.1818	18.1818
19	24	13	54.1667	54.1667	19	24	4	16.6667	16.6667
20	18	10	55.5556	55.5556	20	18	3	16.6667	16.6667
Average value			53.529	53.529	Average value			16.553	16.553
Standard deviation			2.40157	2.40157	Standard deviation			1.44149	1.44149

## Sheet: 7 weeks after pollination
Statistical raw data on the normal development rate of ovules in single ovary at 7 weeks after pollination of two treatments in Castanea henryi
NO.	Pollinated				NO.	Unpollinated
	Number of ovules per a ovary	Normal number of developing ovules	Proportion of normal development ovule	Proportion of normal development ovule ()		Number of ovules per a ovary	Normal number of developing ovules	Proportion of normal development ovule	Proportion of normal development ovule ()
1	24	5	20.8333	20.8333	1	20	0	0	0
2	20	4	20	20	2	18	0	0	0
3	24	5	20.8333	20.8333	3	20	0	0	0
4	22	4	18.1818	18.1818	4	20	0	0	0
5	22	5	22.7273	22.7273	5	18	0	0	0
6	20	4	20	20	6	24	0	0	0
7	20	4	20	20	7	22	0	0	0
8	18	4	22.2222	22.2222	8	18	0	0	0
9	20	4	20	20	9	20	0	0	0
10	24	5	20.8333	20.8333	10	20	0	0	0
11	20	4	20	20	11	22	0	0	0
12	20	4	20	20	12	18	0	0	0
13	22	4	18.1818	18.1818	13	24	0	0	0
14	18	4	22.2222	22.2222	14	22	0	0	0
15	24	5	20.8333	20.8333	15	18	0	0	0
16	18	4	22.2222	22.2222	16	20	0	0	0
17	20	4	20	20	17	22	0	0	0
18	20	4	20	20	18	18	0	0	0
19	22	4	18.1818	18.1818	19	20	0	0	0
20	20	4	20	20	20	22	0	0	0
Average value			20.3636	20.3636	Average value			0	0
Standard deviation			1.30391	1.30391	Standard deviation			0	0
